# Supplementary material for: A Systematic Literature Review of the Epidemiology, Health-Related Quality of Life Impact, and Economic Burden of Immunoglobulin A Nephropathy
Source: PubMed Central journal article supplement (PMC8410133; doi:10.36469/001c.26129), 2021-09-01
Supplement: jheor_2021_8_2_26129_70934.pdf [file jheor_2021_8_2_26129_70934.pdf]

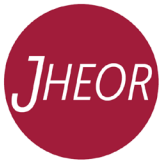

### Supplementary Online Material

Kwon CS, Daniele P, Forsythe A, Ngai C. A Systematic Literature Review of the Epidemiology, Health-Related Quality of Life Impact, and Economic Burden of Immunoglobulin A Nephropathy. *JHEOR*. 2021;8(2)36-45. [doi:10.36469/jheor.2021.26129](https://doi.org/10.36469/jheor.2021.26129)

#### **SLR Methodology**

**Table S1: Search Strategy for Epidemiology**

**Table S2: Search Strategy for Burden of Illness**

This supplementary material has been provided by the authors to give readers additional information about their work.

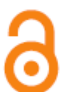

**SLR Methodology:** The methodologic approach followed three steps:

- Titles and abstracts of publications identified in Ovid searches were first independently assessed by two reviewers against pre-defined inclusion and exclusion criteria. Any discrepancies between the reviewers were reconciled by a third reviewer.
- Studies selected for inclusion during the title/abstract review were then assessed based on their full-text publication. Excluded publications were recorded with a justification as per the National Institute for Health and Care Excellence Decision Support Unit guidance.
- All studies selected for inclusion following full-text review underwent data extraction. Data from included studies were extracted into a predefined template, ensuring uniform extraction and consistency across studies.

**Table S1: Search Strategy for Epidemiology**

| Search Conducted              | 26-Jun-2020                                                                                                                                                                                                                                                                                                                                                                                                                                                                                                                                                                                                                                                                                                                |                                                                                                                                                                                          |                                                                                                                                                                                                                                                |        |
|-------------------------------|----------------------------------------------------------------------------------------------------------------------------------------------------------------------------------------------------------------------------------------------------------------------------------------------------------------------------------------------------------------------------------------------------------------------------------------------------------------------------------------------------------------------------------------------------------------------------------------------------------------------------------------------------------------------------------------------------------------------------|------------------------------------------------------------------------------------------------------------------------------------------------------------------------------------------|------------------------------------------------------------------------------------------------------------------------------------------------------------------------------------------------------------------------------------------------|--------|
| Databases Searched            | EBM Reviews - Cochrane Database of Systematic Reviews 2005 to June 17, 2020, EBM Reviews - ACP Journal Club 1991 to May 2020, EBM Reviews - Database of Abstracts of Reviews of Effects 1st Quarter 2016, EBM Reviews - Cochrane Clinical Answers June 2020, EBM Reviews - Cochrane Central Register of Controlled Trials May 2020, EBM Reviews - Cochrane Methodology Register 3rd Quarter 2012, EBM Reviews - Health Technology Assessment 4th Quarter 2016, EBM Reviews - NHS Economic Evaluation Database 1st Quarter 2016, Econlit 1886 to June 18, 2020, Embase 1974 to 2020 June 25, Ovid MEDLINE(R) and Epub Ahead of Print, In-Process & Other Non-Indexed Citations, Daily and Versions(R) 1946 to June 25, 2020 |                                                                                                                                                                                          |                                                                                                                                                                                                                                                |        |
|                               |                                                                                                                                                                                                                                                                                                                                                                                                                                                                                                                                                                                                                                                                                                                            | Term                                                                                                                                                                                     | Hits                                                                                                                                                                                                                                           |        |
| Disease: IgA Nephropathy      | Medline                                                                                                                                                                                                                                                                                                                                                                                                                                                                                                                                                                                                                                                                                                                    | 1                                                                                                                                                                                        | Glomerulonephritis, IGA/                                                                                                                                                                                                                       | 12 383 |
|                               | Embase                                                                                                                                                                                                                                                                                                                                                                                                                                                                                                                                                                                                                                                                                                                     | 2                                                                                                                                                                                        | immunoglobulin A nephropathy/                                                                                                                                                                                                                  | 17 735 |
|                               | All                                                                                                                                                                                                                                                                                                                                                                                                                                                                                                                                                                                                                                                                                                                        | 3                                                                                                                                                                                        | ((IgA or IgA-associated or IgA-induced or IgA-related or IgAassociated or IgAinduced or IgArelated or Immunoglobulin A or Berger or Berger's or Bergers) and (Nephropath\$ or Nephritis or Glomerulonephritis or Glomerulonephritides)).ti,ab. | 21 412 |
|                               |                                                                                                                                                                                                                                                                                                                                                                                                                                                                                                                                                                                                                                                                                                                            | 4                                                                                                                                                                                        | (Bergers Disease\$ or Berger's Disease\$ or Berger Disease\$).ti,ab.                                                                                                                                                                           | 468    |
|                               |                                                                                                                                                                                                                                                                                                                                                                                                                                                                                                                                                                                                                                                                                                                            | 5                                                                                                                                                                                        | IgAN.ti,ab.                                                                                                                                                                                                                                    | 6327   |
| Patients with IgA Nephropathy | 6                                                                                                                                                                                                                                                                                                                                                                                                                                                                                                                                                                                                                                                                                                                          | or/1-5                                                                                                                                                                                   | 24 841                                                                                                                                                                                                                                         |        |
| Study Design-RWE Study        | 7                                                                                                                                                                                                                                                                                                                                                                                                                                                                                                                                                                                                                                                                                                                          | epidemiologic studies/                                                                                                                                                                   | 216 391                                                                                                                                                                                                                                        |        |
|                               | 8                                                                                                                                                                                                                                                                                                                                                                                                                                                                                                                                                                                                                                                                                                                          | exp case control studies/ or exp case control study/                                                                                                                                     | 216 391                                                                                                                                                                                                                                        |        |
|                               | 9                                                                                                                                                                                                                                                                                                                                                                                                                                                                                                                                                                                                                                                                                                                          | exp cohort studies/                                                                                                                                                                      | 2744 329                                                                                                                                                                                                                                       |        |
|                               | 10                                                                                                                                                                                                                                                                                                                                                                                                                                                                                                                                                                                                                                                                                                                         | cross-sectional studies/                                                                                                                                                                 | 559 530                                                                                                                                                                                                                                        |        |
|                               | 11                                                                                                                                                                                                                                                                                                                                                                                                                                                                                                                                                                                                                                                                                                                         | clinical study/                                                                                                                                                                          | 158 845                                                                                                                                                                                                                                        |        |
|                               | 12                                                                                                                                                                                                                                                                                                                                                                                                                                                                                                                                                                                                                                                                                                                         | family study/                                                                                                                                                                            | 26 030                                                                                                                                                                                                                                         |        |
|                               | 13                                                                                                                                                                                                                                                                                                                                                                                                                                                                                                                                                                                                                                                                                                                         | longitudinal study/                                                                                                                                                                      | 275 734                                                                                                                                                                                                                                        |        |
|                               | 14                                                                                                                                                                                                                                                                                                                                                                                                                                                                                                                                                                                                                                                                                                                         | retrospective study/                                                                                                                                                                     | 1754 147                                                                                                                                                                                                                                       |        |
|                               | 15                                                                                                                                                                                                                                                                                                                                                                                                                                                                                                                                                                                                                                                                                                                         | prospective study/                                                                                                                                                                       | 1 149 348                                                                                                                                                                                                                                      |        |
|                               | 16                                                                                                                                                                                                                                                                                                                                                                                                                                                                                                                                                                                                                                                                                                                         | cross-sectional study/                                                                                                                                                                   | 688 104                                                                                                                                                                                                                                        |        |
|                               | 17                                                                                                                                                                                                                                                                                                                                                                                                                                                                                                                                                                                                                                                                                                                         | cohort analysis/                                                                                                                                                                         | 853 062                                                                                                                                                                                                                                        |        |
|                               | 18                                                                                                                                                                                                                                                                                                                                                                                                                                                                                                                                                                                                                                                                                                                         | (case control or case-control).ti,ab.                                                                                                                                                    | 295 390                                                                                                                                                                                                                                        |        |
|                               | 19                                                                                                                                                                                                                                                                                                                                                                                                                                                                                                                                                                                                                                                                                                                         | (cohort adj (study or studies or analys*)).ti,ab.                                                                                                                                        | 537 959                                                                                                                                                                                                                                        |        |
|                               | 20                                                                                                                                                                                                                                                                                                                                                                                                                                                                                                                                                                                                                                                                                                                         | ((follow up or follow-up or observational or uncontrolled or non randomi#ed or nonrandomi#ed or non-randomi#ed or epidemiologic*) adj (study or studies)).ti,ab.                         | 615 132                                                                                                                                                                                                                                        |        |
|                               | 21                                                                                                                                                                                                                                                                                                                                                                                                                                                                                                                                                                                                                                                                                                                         | ((longitudinal or retrospective or prospective or cross sectional or cross-sectional) and (study or studies or review or analys* or cohort*)).ti,ab.                                     | 3 807 708                                                                                                                                                                                                                                      |        |
|                               | 22                                                                                                                                                                                                                                                                                                                                                                                                                                                                                                                                                                                                                                                                                                                         | ((non-interventional or pragmatic) and (study or studies)).ti,ab.                                                                                                                        | 37 165                                                                                                                                                                                                                                         |        |
|                               | 23                                                                                                                                                                                                                                                                                                                                                                                                                                                                                                                                                                                                                                                                                                                         | (registry or register or database or claims or single center or single-center or multicenter or multi-center or natural history or survey or record\$ or real world or real-world).ti,ab | 5 537 302                                                                                                                                                                                                                                      |        |
|                               | 24                                                                                                                                                                                                                                                                                                                                                                                                                                                                                                                                                                                                                                                                                                                         | follow-up/                                                                                                                                                                               | 1 551 654                                                                                                                                                                                                                                      |        |
|                               | 25                                                                                                                                                                                                                                                                                                                                                                                                                                                                                                                                                                                                                                                                                                                         | cohort*.ti,ab.                                                                                                                                                                           | 1 654 637                                                                                                                                                                                                                                      |        |
|                               | 26                                                                                                                                                                                                                                                                                                                                                                                                                                                                                                                                                                                                                                                                                                                         | 24 and 25                                                                                                                                                                                | 223 769                                                                                                                                                                                                                                        |        |
|                               | 27                                                                                                                                                                                                                                                                                                                                                                                                                                                                                                                                                                                                                                                                                                                         | or/7-23, 26                                                                                                                                                                              | 11 005 365                                                                                                                                                                                                                                     |        |

**Table S1: Search Strategy for Epidemiology**

|                                                                          |    |                                                                                                                                                                                                                                                                                                                                                                                                                                          |            |
|--------------------------------------------------------------------------|----|------------------------------------------------------------------------------------------------------------------------------------------------------------------------------------------------------------------------------------------------------------------------------------------------------------------------------------------------------------------------------------------------------------------------------------------|------------|
| RWE Studies in Patients with IgA Nephropathy                             | 28 | 6 and 27                                                                                                                                                                                                                                                                                                                                                                                                                                 | 6129       |
| Irrelevant Study Design                                                  | 29 | (addresses or bibliography or biography or case report or comment or congresses or consensus development conference or duplicate publication or editorial or guideline or in vitro or interview or lectures or letter or monograph or news or “newspaper article” or practice guideline or “review” or “review literature” or “review of reported cases” or review, academic or review, multicase or review, tutorial or twin study).pt. | 9 306 598  |
|                                                                          | 30 | (animals/ not (humans/ and animals/)) or (animal/ not (human/ and animal/))                                                                                                                                                                                                                                                                                                                                                              | 5 794 096  |
|                                                                          | 31 | case report/ or case reports/                                                                                                                                                                                                                                                                                                                                                                                                            | 4 594 458  |
|                                                                          | 32 | or/29-31                                                                                                                                                                                                                                                                                                                                                                                                                                 | 18 696 563 |
|                                                                          | 33 | 28 not 32                                                                                                                                                                                                                                                                                                                                                                                                                                | 5466       |
| Limits                                                                   | 34 | limit 33 to English language                                                                                                                                                                                                                                                                                                                                                                                                             | 4991       |
|                                                                          | 35 | limit 34 to human                                                                                                                                                                                                                                                                                                                                                                                                                        | 4725       |
|                                                                          | 36 | limit 35 to yr="2010 -Current"                                                                                                                                                                                                                                                                                                                                                                                                           | 3141       |
| FINAL SELECTED: RWE Studies Reporting Epidemiology in Patients with IgAN | 37 | Deduplicate                                                                                                                                                                                                                                                                                                                                                                                                                              | 2343       |

**Table S2: Search Strategy for Burden of Illness**

| Search Conducted             |     | 25-Jun-2020                                                                                                                                                                                                                                                                                                                                                                                                                                                                                                                                                                                                                                                                                                                |                                                                                                                                                                                                                                                |                                                                        |        |
|------------------------------|-----|----------------------------------------------------------------------------------------------------------------------------------------------------------------------------------------------------------------------------------------------------------------------------------------------------------------------------------------------------------------------------------------------------------------------------------------------------------------------------------------------------------------------------------------------------------------------------------------------------------------------------------------------------------------------------------------------------------------------------|------------------------------------------------------------------------------------------------------------------------------------------------------------------------------------------------------------------------------------------------|------------------------------------------------------------------------|--------|
| Databases Searched           |     | EBM Reviews - Cochrane Database of Systematic Reviews 2005 to June 17, 2020, EBM Reviews - ACP Journal Club 1991 to May 2020, EBM Reviews - Database of Abstracts of Reviews of Effects 1st Quarter 2016, EBM Reviews - Cochrane Clinical Answers June 2020, EBM Reviews - Cochrane Central Register of Controlled Trials May 2020, EBM Reviews - Cochrane Methodology Register 3rd Quarter 2012, EBM Reviews - Health Technology Assessment 4th Quarter 2016, EBM Reviews - NHS Economic Evaluation Database 1st Quarter 2016, Econlit 1886 to June 18, 2020, Embase 1974 to 2020 June 24, Ovid MEDLINE(R) and Epub Ahead of Print, In-Process & Other Non-Indexed Citations, Daily and Versions(R) 1946 to June 23, 2020 |                                                                                                                                                                                                                                                |                                                                        |        |
|                              |     | Term                                                                                                                                                                                                                                                                                                                                                                                                                                                                                                                                                                                                                                                                                                                       | Hits                                                                                                                                                                                                                                           |                                                                        |        |
| Disease:<br>Nephropathy      | IgA | Medline                                                                                                                                                                                                                                                                                                                                                                                                                                                                                                                                                                                                                                                                                                                    | 1                                                                                                                                                                                                                                              | Glomerulonephritis, IGA/                                               | 12380  |
|                              |     | Embase                                                                                                                                                                                                                                                                                                                                                                                                                                                                                                                                                                                                                                                                                                                     | 2                                                                                                                                                                                                                                              | immunoglobulin A nephropathy/                                          | 17732  |
|                              | All | 3                                                                                                                                                                                                                                                                                                                                                                                                                                                                                                                                                                                                                                                                                                                          | ((IgA or IgA-associated or IgA-induced or IgA-related or IgAassociated or IgAinduced or IgArelated or Immunoglobulin A or Berger or Berger's or Bergers) and (Nephropath\$ or Nephritis or Glomerulonephritis or Glomerulonephritides)).ti,ab. | 21409                                                                  |        |
|                              |     | 4                                                                                                                                                                                                                                                                                                                                                                                                                                                                                                                                                                                                                                                                                                                          | (Bergers Disease\$ or Berger's Disease\$ or Berger Disease\$).ti,ab.                                                                                                                                                                           | 468                                                                    |        |
|                              |     | 5                                                                                                                                                                                                                                                                                                                                                                                                                                                                                                                                                                                                                                                                                                                          | IgAN.ti,ab.                                                                                                                                                                                                                                    | 6325                                                                   |        |
| Patients with<br>Nephropathy | IgA |                                                                                                                                                                                                                                                                                                                                                                                                                                                                                                                                                                                                                                                                                                                            | 6                                                                                                                                                                                                                                              | or/1-5                                                                 | 24838  |
| QOL Outcomes                 | QOL |                                                                                                                                                                                                                                                                                                                                                                                                                                                                                                                                                                                                                                                                                                                            | 7                                                                                                                                                                                                                                              | "quality of life"/                                                     | 685023 |
|                              |     |                                                                                                                                                                                                                                                                                                                                                                                                                                                                                                                                                                                                                                                                                                                            | 8                                                                                                                                                                                                                                              | "quality of life".de.                                                  | 685023 |
|                              |     |                                                                                                                                                                                                                                                                                                                                                                                                                                                                                                                                                                                                                                                                                                                            | 9                                                                                                                                                                                                                                              | (QOL* or HQL* or HQOL* or H QOL* or HRQL* or HRQOL* or HR QOL*).ti,ab. | 184462 |
|                              |     | 10                                                                                                                                                                                                                                                                                                                                                                                                                                                                                                                                                                                                                                                                                                                         | (quality adj4 life).ti,ab.                                                                                                                                                                                                                     | 843584                                                                 |        |
|                              |     | 11                                                                                                                                                                                                                                                                                                                                                                                                                                                                                                                                                                                                                                                                                                                         | (quality adj2 well?being).ti,ab.                                                                                                                                                                                                               | 963                                                                    |        |
|                              |     | PRO                                                                                                                                                                                                                                                                                                                                                                                                                                                                                                                                                                                                                                                                                                                        | 12                                                                                                                                                                                                                                             | Patient Reported Outcome Measures/                                     | 26195  |
|                              |     | 13                                                                                                                                                                                                                                                                                                                                                                                                                                                                                                                                                                                                                                                                                                                         | patient-reported outcome/                                                                                                                                                                                                                      | 28360                                                                  |        |
|                              |     | 14                                                                                                                                                                                                                                                                                                                                                                                                                                                                                                                                                                                                                                                                                                                         | (patient adj2 reported adj2 outcome\$).ti,ab.                                                                                                                                                                                                  | 58615                                                                  |        |
|                              |     | 15                                                                                                                                                                                                                                                                                                                                                                                                                                                                                                                                                                                                                                                                                                                         | (preference* adj4 (patient* or public or valu* or measur*)).ti,ab                                                                                                                                                                              | 66987                                                                  |        |
|                              |     | 16                                                                                                                                                                                                                                                                                                                                                                                                                                                                                                                                                                                                                                                                                                                         | PRO.ti,ab.                                                                                                                                                                                                                                     | 502479                                                                 |        |
|                              |     | Utility                                                                                                                                                                                                                                                                                                                                                                                                                                                                                                                                                                                                                                                                                                                    | 17                                                                                                                                                                                                                                             | (utilit\$ or disutilit\$).ti,ab.                                       | 543709 |
|                              |     | 18                                                                                                                                                                                                                                                                                                                                                                                                                                                                                                                                                                                                                                                                                                                         | (standard adj1 gamble*).ti,ab.                                                                                                                                                                                                                 | 2147                                                                   |        |
|                              |     | 19                                                                                                                                                                                                                                                                                                                                                                                                                                                                                                                                                                                                                                                                                                                         | ((("time trade" adj1 off*) or (time adj1 tradeoff*) or timetradeoff).ti,ab.                                                                                                                                                                    | 3819                                                                   |        |
|                              |     | 20                                                                                                                                                                                                                                                                                                                                                                                                                                                                                                                                                                                                                                                                                                                         | (willingness adj4 pay).ti,ab.                                                                                                                                                                                                                  | 21681                                                                  |        |
|                              |     | 21                                                                                                                                                                                                                                                                                                                                                                                                                                                                                                                                                                                                                                                                                                                         | (SG or TTO or WTP).ti,ab.                                                                                                                                                                                                                      | 36124                                                                  |        |
|                              | 22  | ((valu* or measur*) adj4 (health or outcome or outcomes or effect or effects or change* or state*)).ti,ab                                                                                                                                                                                                                                                                                                                                                                                                                                                                                                                                                                                                                  | 1321280                                                                                                                                                                                                                                        |                                                                        |        |
|                              | 23  | (euroqol\$ or (euro adj1 qol\$) or euro-qol\$ or euroqual\$ or (euro adj1 qual\$) or euro-qual\$ or eq5d\$ or eq 5d\$ or eq-5d\$).mp,af,tw.                                                                                                                                                                                                                                                                                                                                                                                                                                                                                                                                                                                | 43316                                                                                                                                                                                                                                          |                                                                        |        |
|                              | 24  | (VAS or visual analogue scale\$ or visual-analogue scale\$).ti,ab.                                                                                                                                                                                                                                                                                                                                                                                                                                                                                                                                                                                                                                                         | 199562                                                                                                                                                                                                                                         |                                                                        |        |
|                              | 25  | (Health Utilities Index or hui*).ti,ab.                                                                                                                                                                                                                                                                                                                                                                                                                                                                                                                                                                                                                                                                                    | 11379                                                                                                                                                                                                                                          |                                                                        |        |
|                              | 26  | (multiattribute* adj1 (health or theor* or analys*)).ti,ab.                                                                                                                                                                                                                                                                                                                                                                                                                                                                                                                                                                                                                                                                | 92                                                                                                                                                                                                                                             |                                                                        |        |
|                              | 27  | ((multi adj1 attribute*) and (attribute* adj1 theor*)).ti,ab.                                                                                                                                                                                                                                                                                                                                                                                                                                                                                                                                                                                                                                                              | 4                                                                                                                                                                                                                                              |                                                                        |        |
|                              | 28  | ((multi adj1 attribute*) and (attribute* adj1 analys*)).ti,ab.                                                                                                                                                                                                                                                                                                                                                                                                                                                                                                                                                                                                                                                             | 28                                                                                                                                                                                                                                             |                                                                        |        |
|                              | 29  | ((multi adj1 attribute*) and (attribute* adj1 health)).ti,ab.                                                                                                                                                                                                                                                                                                                                                                                                                                                                                                                                                                                                                                                              | 90                                                                                                                                                                                                                                             |                                                                        |        |
|                              | 30  | (Productivit\$ or WPAI or work\$ or employ\$).ti,ab.                                                                                                                                                                                                                                                                                                                                                                                                                                                                                                                                                                                                                                                                       | 4958120                                                                                                                                                                                                                                        |                                                                        |        |
|                              | 31  | sickness impact profile/                                                                                                                                                                                                                                                                                                                                                                                                                                                                                                                                                                                                                                                                                                   | 10036                                                                                                                                                                                                                                          |                                                                        |        |

**Table S2: Search Strategy for Burden of Illness**

|                                                           |                  |    |                                                                                                                                                                                                                                                                                                                                                                                                                              |            |
|-----------------------------------------------------------|------------------|----|------------------------------------------------------------------------------------------------------------------------------------------------------------------------------------------------------------------------------------------------------------------------------------------------------------------------------------------------------------------------------------------------------------------------------|------------|
|                                                           |                  | 32 | (sickness impact profile or SIP).mp,af,tw.                                                                                                                                                                                                                                                                                                                                                                                   | 19960      |
|                                                           | QoL measurements | 33 | (sf-36\$ or sf36\$ or sf 36\$ or sf-12\$ or sf12\$ or sf 12\$ or sf-6\$ or sf6\$ or sf 6\$ or short form\$ or shortform\$ or RAND).mp,af,tw.                                                                                                                                                                                                                                                                                 | 190 021    |
|                                                           |                  | 34 | (KDQOL-SF or KDQOLSF or KDQOL or KDQOL-36 or KDQOL36 or Kidney Disease Questionnaire or KDQ or NHP or “Nottingham Health Profile” or CHEP or CHOICE Health Experience Questionnaire or WHOQOL-BREF or WHOQOLBREF or WHOQOL).mp,af,tw.                                                                                                                                                                                        | 20217      |
| ECON Outcomes                                             | Cost             | 35 | exp health care cost/                                                                                                                                                                                                                                                                                                                                                                                                        | 362 802    |
|                                                           |                  | 36 | “Costs and Cost Analysis”/                                                                                                                                                                                                                                                                                                                                                                                                   | 105 334    |
|                                                           |                  | 37 | exp fee/                                                                                                                                                                                                                                                                                                                                                                                                                     | 70 479     |
|                                                           |                  | 38 | cost.de                                                                                                                                                                                                                                                                                                                                                                                                                      | 58 132     |
|                                                           |                  | 39 | cost*.ti,ab.                                                                                                                                                                                                                                                                                                                                                                                                                 | 1 653 101  |
|                                                           |                  | 40 | fee*.ti,ab.                                                                                                                                                                                                                                                                                                                                                                                                                  | 1 339 712  |
|                                                           |                  | 41 | (price or pricing).ti,ab                                                                                                                                                                                                                                                                                                                                                                                                     | 206 753    |
|                                                           |                  | 42 | “drug use”.de                                                                                                                                                                                                                                                                                                                                                                                                                | 114 345    |
|                                                           |                  | 43 | “drug utilization”.de                                                                                                                                                                                                                                                                                                                                                                                                        | 41 082     |
|                                                           | HCRU             | 44 | (resource\$ adj4 use\$).ti,ab                                                                                                                                                                                                                                                                                                                                                                                                | 87 107     |
|                                                           |                  | 45 | (resource* adj4 usage).ti,ab                                                                                                                                                                                                                                                                                                                                                                                                 | 2067       |
|                                                           |                  | 46 | (resource* adj4 utili*).ti,ab                                                                                                                                                                                                                                                                                                                                                                                                | 49 565     |
|                                                           | BOI              | 47 | burden\$.ti,ab.                                                                                                                                                                                                                                                                                                                                                                                                              | 583 166    |
|                                                           |                  | 48 | or/7-47                                                                                                                                                                                                                                                                                                                                                                                                                      | 1 1170 425 |
| QOL or Econ Studies in Patients with IgA Nephropathy      |                  | 49 | 6 and 48                                                                                                                                                                                                                                                                                                                                                                                                                     | 1891       |
| Irrelevant Study Design                                   |                  | 50 | (addresses or bibliography or biography or case report or comment or congresses or consensus development conference or duplicate publication or editorial or guideline or in vitro or interview or lectures or letter or monograph or news or “newspaper article” or practice guideline or “review literature” or “review of reported cases” or review, academic or review, multicase or review, tutorial or twin study).pt. | 4 104 235  |
|                                                           |                  | 51 | (animals/ not (humans/ and animals/)) or (animal/ not (human/ and animal/))                                                                                                                                                                                                                                                                                                                                                  | 5 793 464  |
|                                                           |                  | 52 | case report/ or case reports/                                                                                                                                                                                                                                                                                                                                                                                                | 4 593 648  |
|                                                           |                  | 53 | or/50-52                                                                                                                                                                                                                                                                                                                                                                                                                     | 13 901 217 |
|                                                           |                  | 54 | 49 not 53                                                                                                                                                                                                                                                                                                                                                                                                                    | 1593       |
| Limits                                                    |                  | 55 | limit 54 to English language                                                                                                                                                                                                                                                                                                                                                                                                 | 1496       |
|                                                           |                  | 56 | limit 55 to human                                                                                                                                                                                                                                                                                                                                                                                                            | 1334       |
|                                                           |                  | 57 | limit 56 to yr=“2010 -Current”                                                                                                                                                                                                                                                                                                                                                                                               | 884        |
| FINAL SELECTED: QOL or Econ Studies in Patients with IgAN |                  | 58 | Deduplicate                                                                                                                                                                                                                                                                                                                                                                                                                  | 687        |
